# Supplementary material
Source: PubMed Central journal article supplement (PMC3159704)
Supplement: NIHMS311426-supplement-01.pdf [file NIHMS311426-supplement-01.pdf]

Supplemental Figure 1

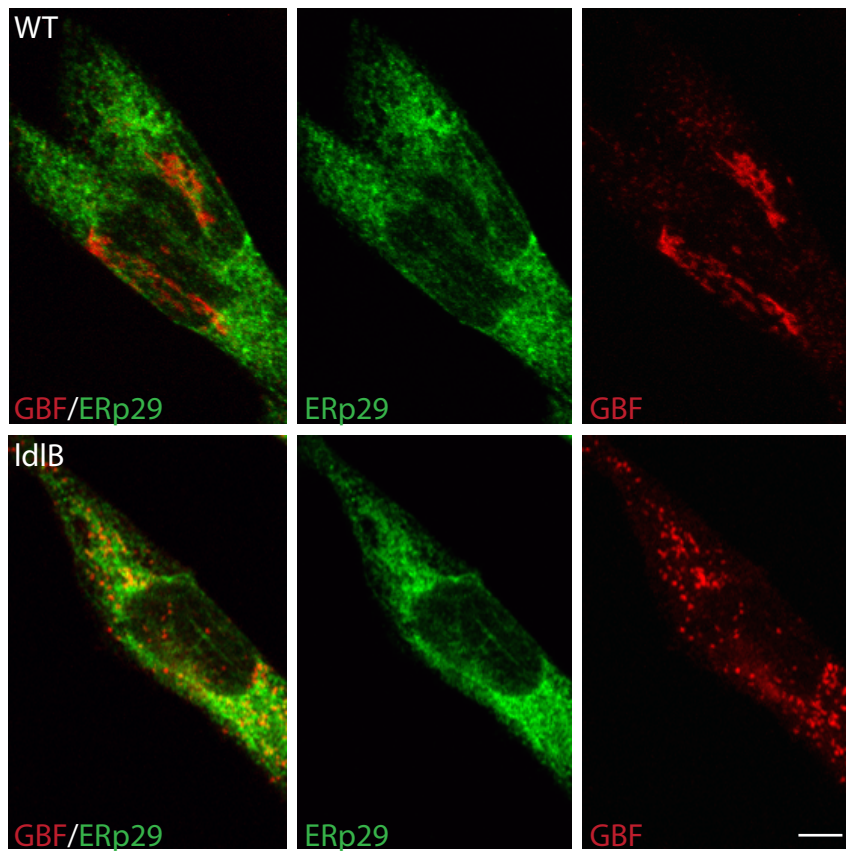

**Supplemental Figure 1 - GBF1 and ERp29 localization in WT and IdIB CHO cells.** Cells were co-stained with antisera against GBF1 and ERp29 and visualized using confocal microscopy. There is essentially no overlap between the two markers in WT cells and minor co-localization in the IdIB cells
